# Supplementary material for: Comparative Study of Lectin Domains in Model Species: New Insights into Evolutionary Dynamics
Source: MDPI journal article supplement (doi:10.3390/ijms18061136), 2017-05-25
Supplement: s1 [file s1]

# Comparative Study of Lectin Domains in Model Species: New Insights into Evolutionary Dynamics

Sofie Van Holle<sup>1</sup>, Kristof De Schutter<sup>1,2</sup>, Lore Eggermont<sup>1</sup>, Mariya Tsaneva<sup>1</sup>, Liuyi Dang<sup>1</sup> and Els J.M. Van Damme<sup>1,\*</sup>

## Supplementary Materials:

**Table S1.** Relationship between the number of lectin genes and genome size, chromosome number and protein-coding transcripts

|                                               | <i>Arabidopsis</i> | Soybean | Cucumber | Rice ( <i>japonica</i> ) | Rice ( <i>indica</i> ) |
|-----------------------------------------------|--------------------|---------|----------|--------------------------|------------------------|
| Total number of lectin genes                  | 216                | 368     | 146      | 329                      | 278                    |
| Genome size (Mb)                              | 135                | 1,115   | 367      | 385                      | 389                    |
| Chromosome number                             | 5                  | 20      | 7        | 12                       | 12                     |
| Protein-coding transcripts                    | 35,386             | 88,647  | 32,528   | 52,424                   | 56,284                 |
| Ratio lectins/genome size                     | 1.60               | 0.33    | 0.40     | 0.85                     | 0.71                   |
| Percentage lectins/protein-coding transcripts | 0.61               | 0.42    | 0.45     | 0.62                     | 0.49                   |
| Number of whole genome duplications           | 3                  | 3       | 1        | 3                        | 3                      |

**Table S2.** Number of all identified domain combinations containing lectin motifs in the species under study. Numbers between brackets indicate the number of repeats.

Shown in the excel of Supplementary Table S2.

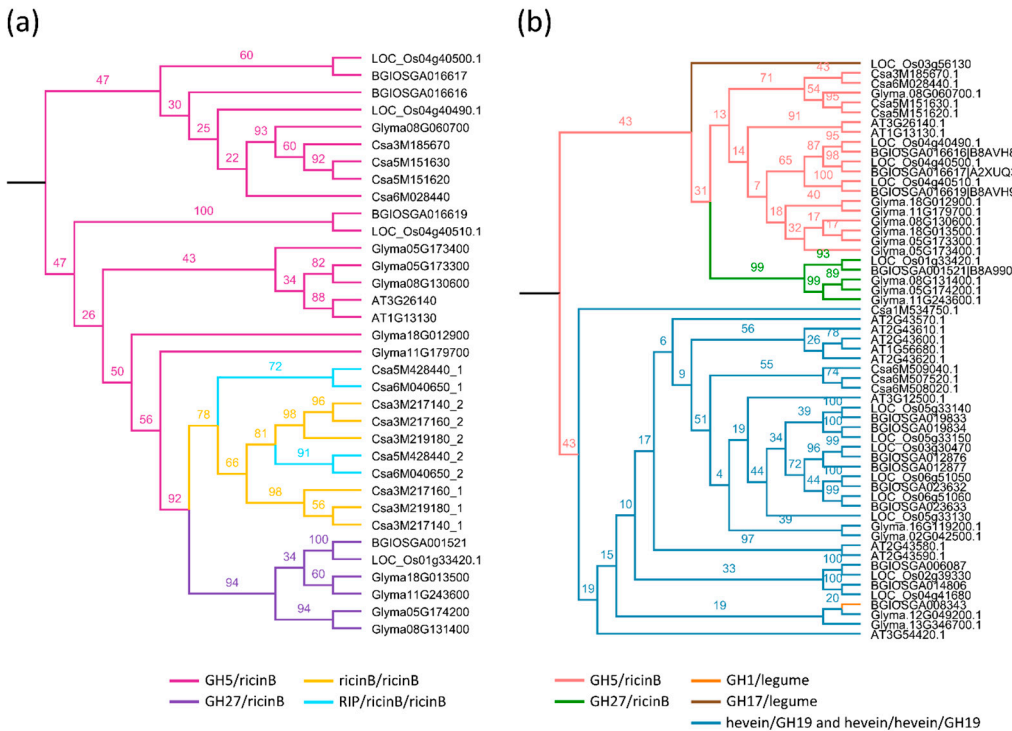

**Figure S1.** Phylogenetic relationships of all ricin B (a) and GH (b) domain sequences from *Arabidopsis* (AT), soybean (Glyma), cucumber (Csa), and rice (*japonica*: LOC\_Os, *indica*: BGIOGA). The numbers indicate the bootstrap values and the colored branches correspond to the different domain architectures of the full-length ricin B (a) and GH (b) protein sequences.

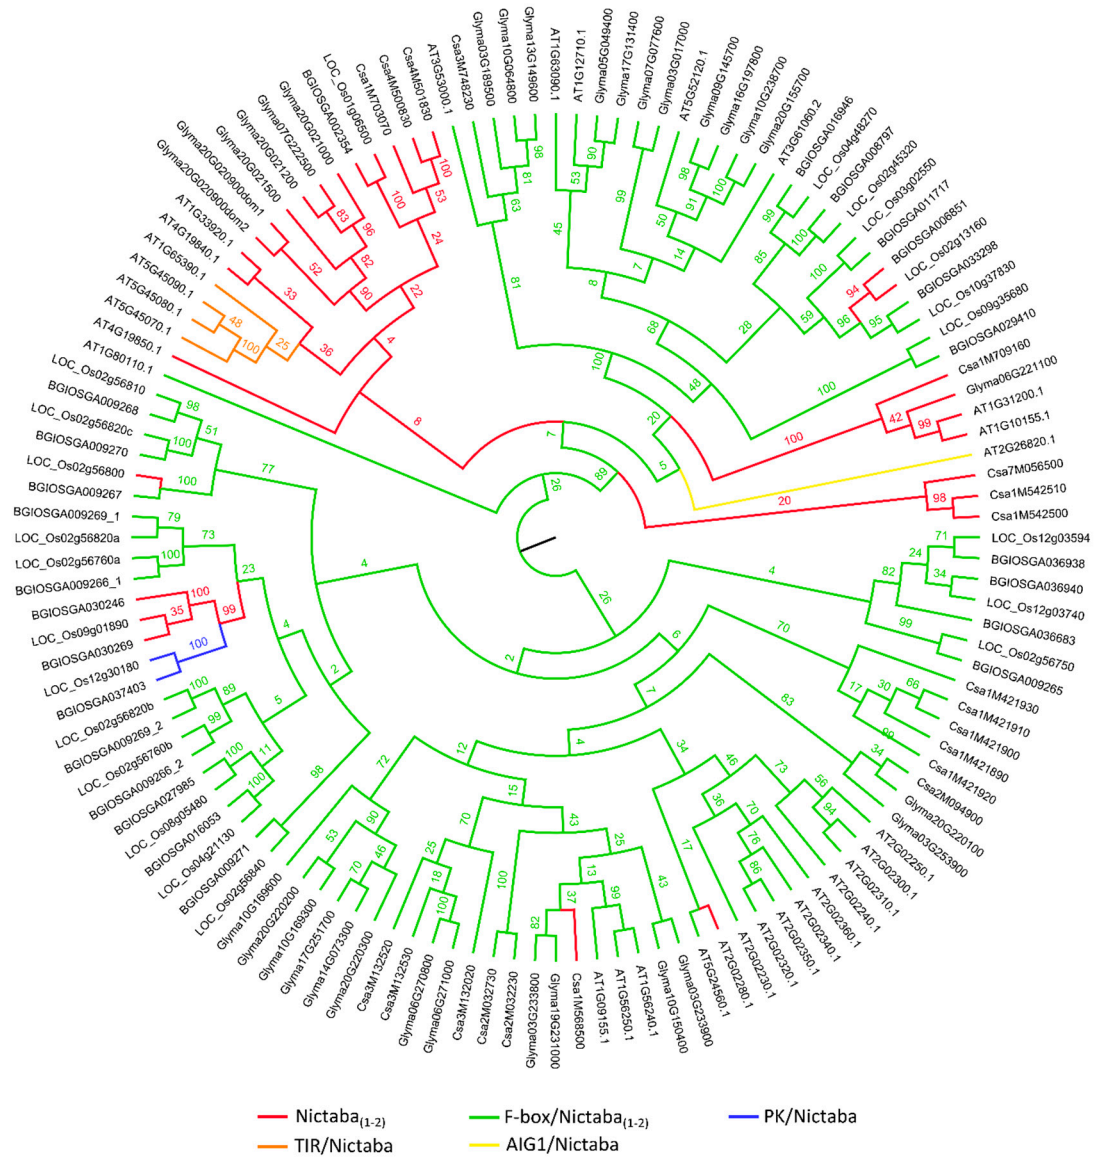

**Figure S2.** Phylogenetic relationships of the Nictaba domain sequences from *Arabidopsis* (AT), soybean (*Glyma*), cucumber (*Csa*), and rice (*japonica*: LOC\_Os, *indica*: BGIOGA). The numbers indicate the bootstrap values and the colored branches correspond to the different domain architectures of the full-length Nictaba protein sequences.

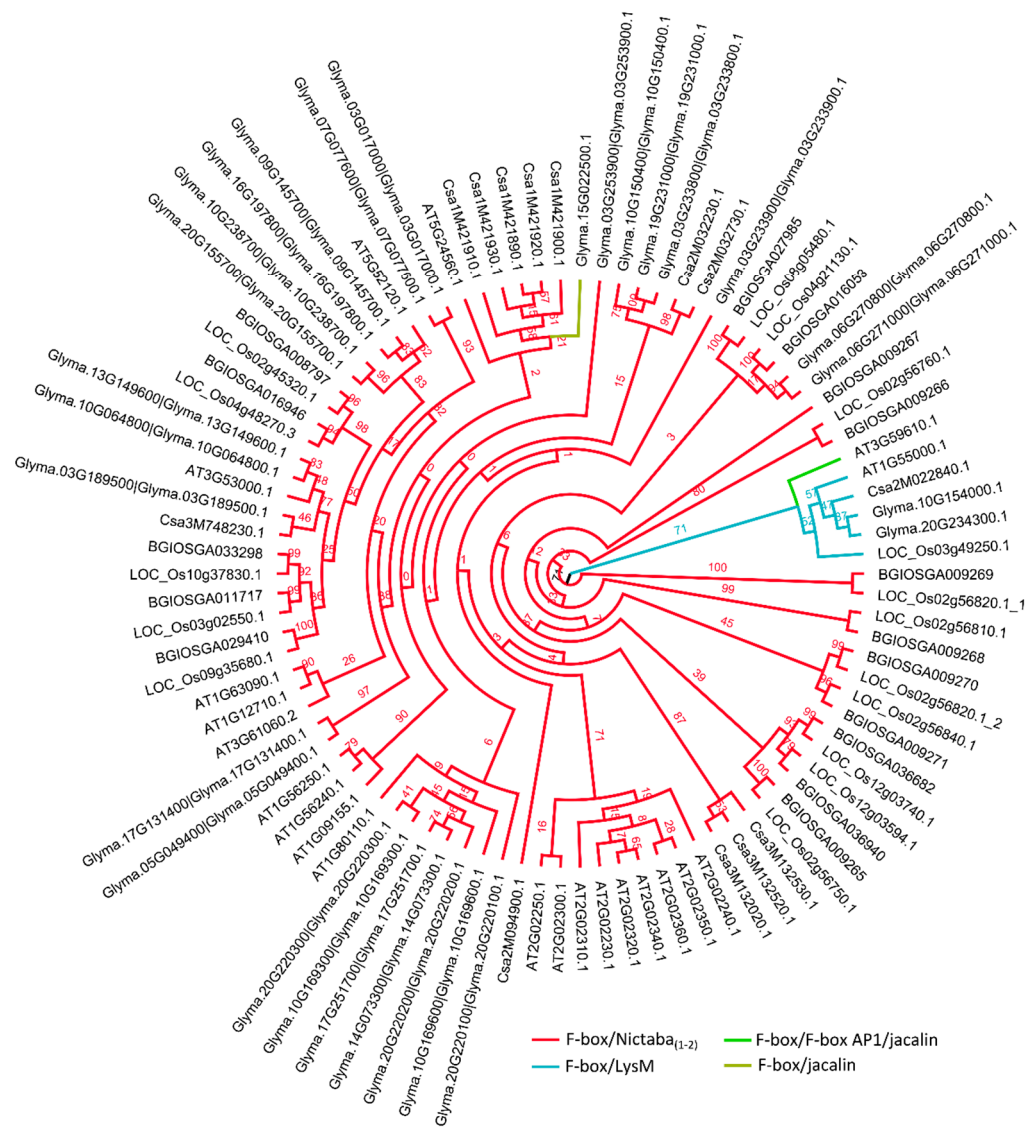

**Figure S3.** Phylogenetic relationships of the F-box domain sequences from *Arabidopsis* (AT), soybean (*Glyma*), cucumber (*Csa*), and rice (*japonica*: LOC\_Os, *indica*: BGIOGA). The numbers indicate the bootstrap values and the colored branches correspond to the different domain architectures of the full-length F-box protein sequences.

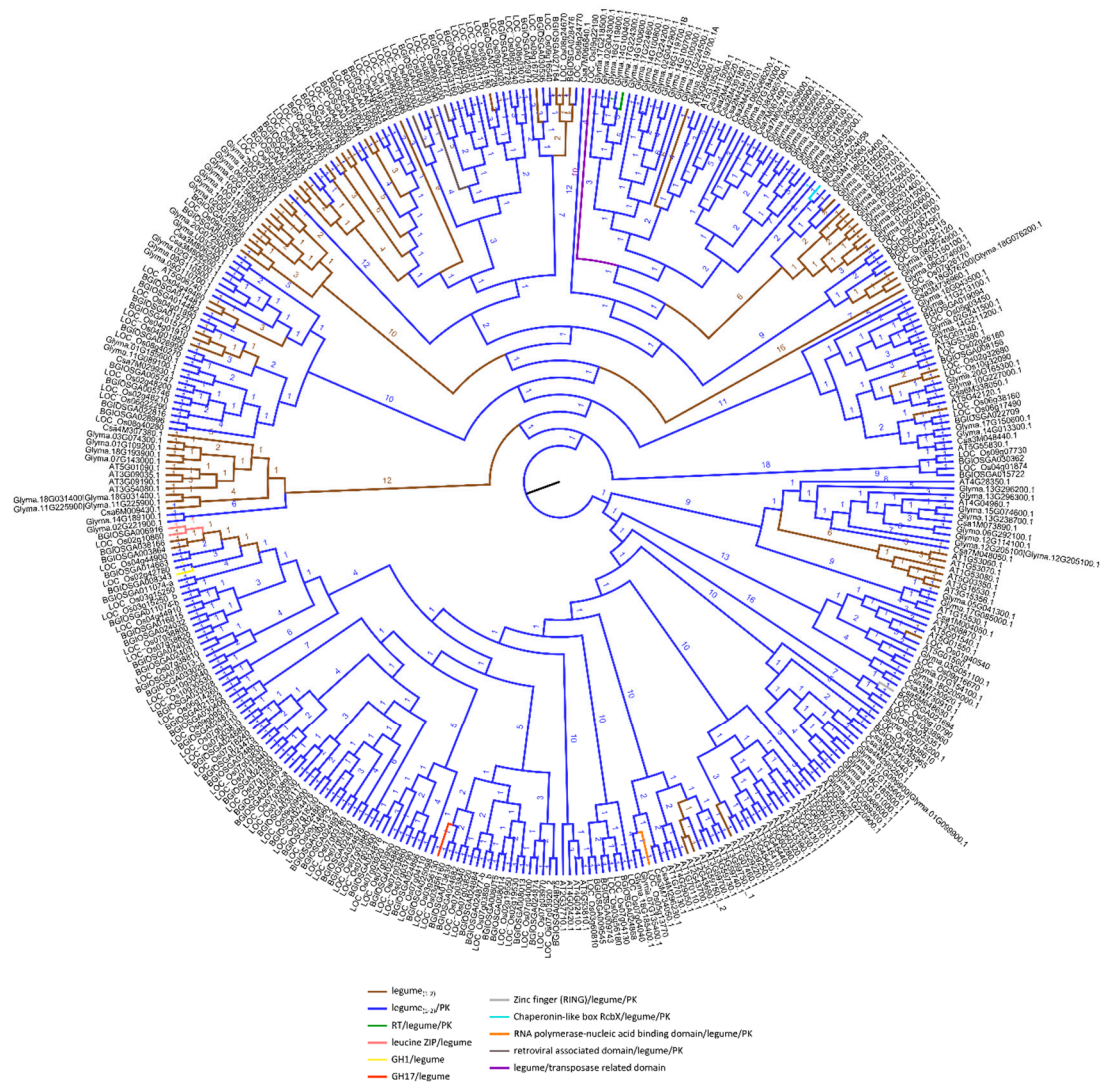

**Figure S4.** Phylogenetic relationships of the legume lectin domain sequences from *Arabidopsis* (AT), soybean (*Glyma*), cucumber (*Csa*), and rice (*japonica*: LOC\_Os, *indica*: BGIOGA). The numbers indicate the bootstrap values and the colored branches correspond to the different domain architectures of the full-length protein sequences.



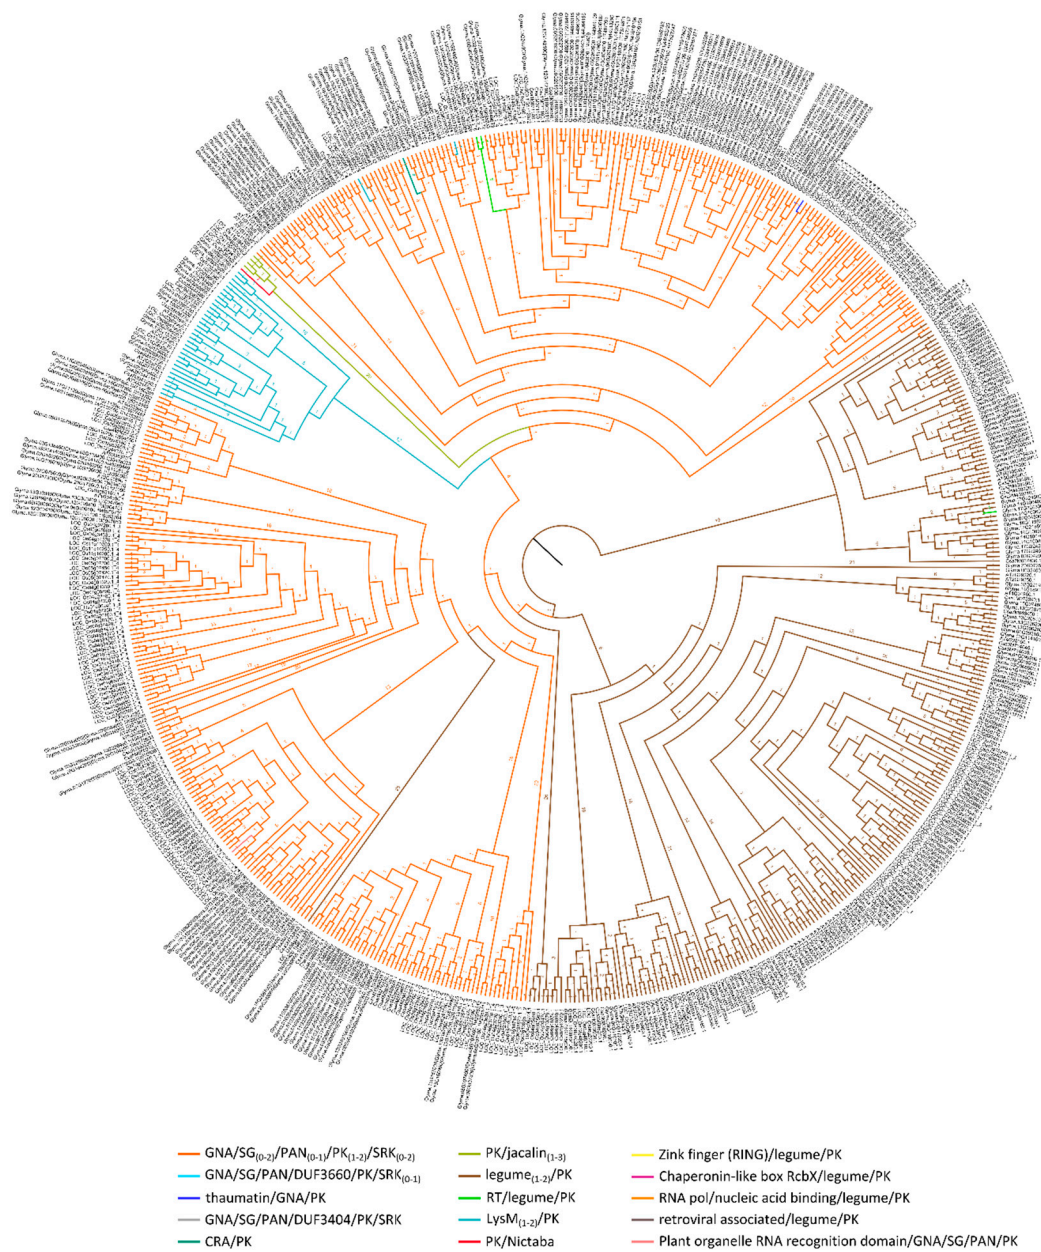

**Figure S5.** Phylogenetic relationships of the PK domain sequences from *Arabidopsis* (AT), soybean (Glyma), cucumber (Csa), and rice (*japonica*: LOC\_Os). The numbers indicate the bootstrap values and the colored branches correspond to the different domain architectures of the full-length PK sequences.

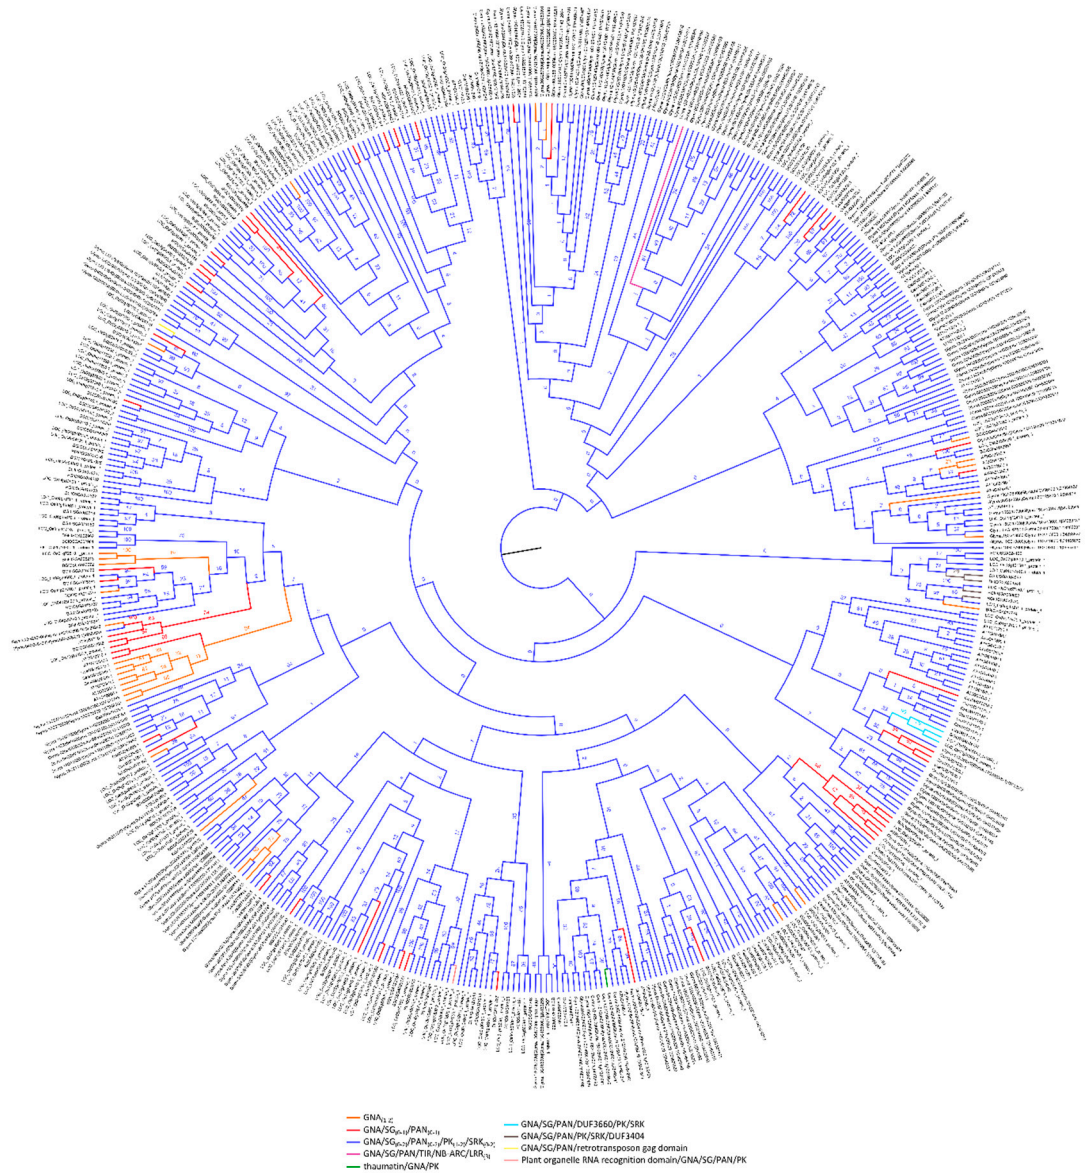

**Figure S6.** Phylogenetic relationships of the GNA domain sequences from *Arabidopsis* (AT), soybean (Glyma), cucumber (Csa), and rice (*japonica*: LOC\_Os, *indica*: BGIOGA). The numbers indicate the bootstrap values and the colored branches correspond to the different domain architectures of the full-length GNA lectin sequences.



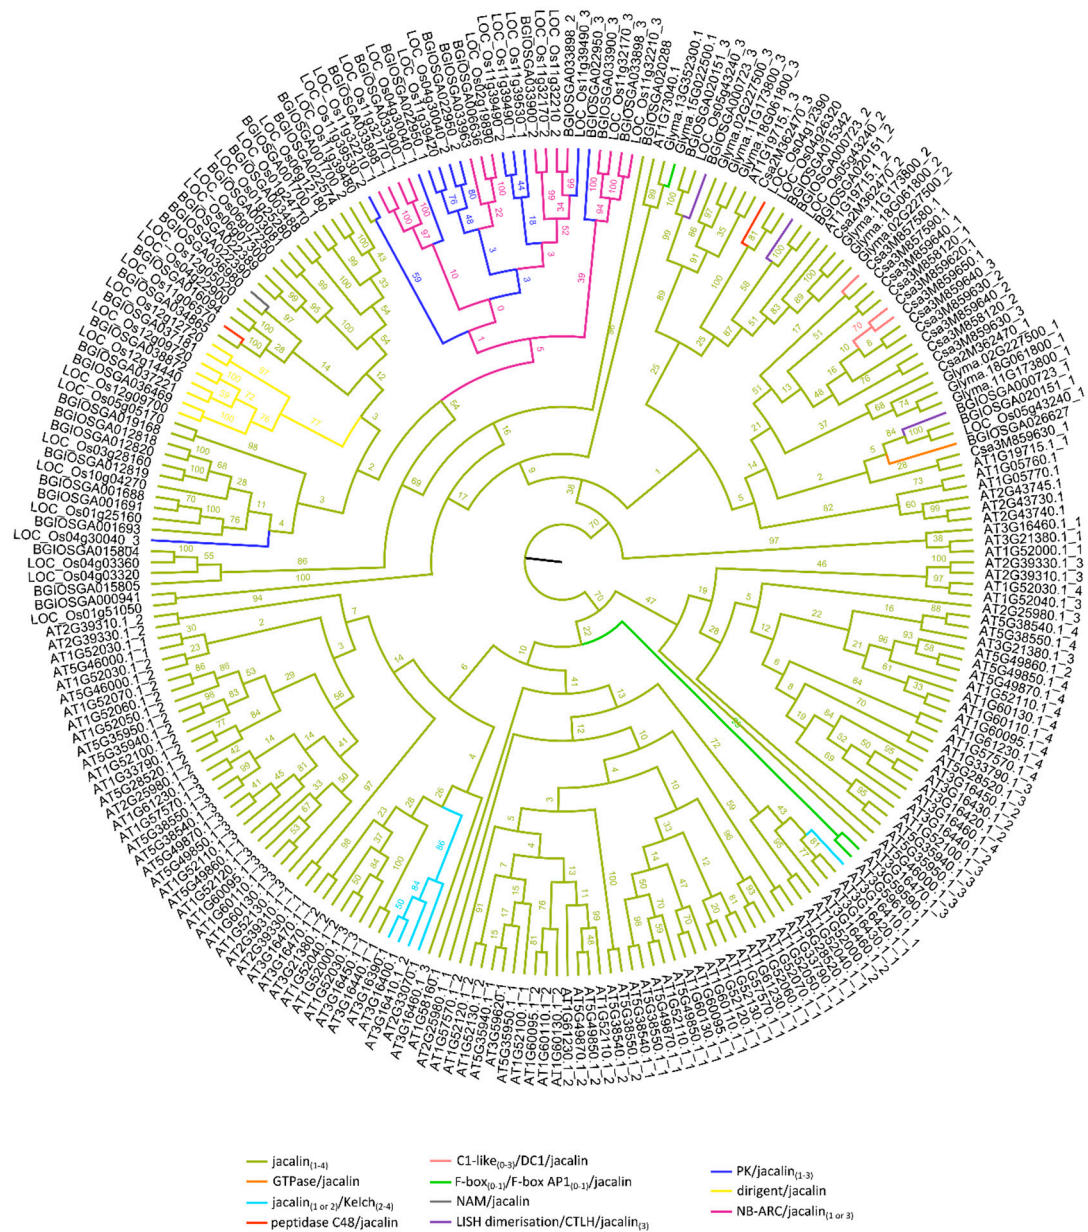

**Figure S7.** Phylogenetic relationships of the JRL domain sequences from *Arabidopsis* (AT), soybean (*Glyma*), cucumber (*Csa*), and rice (*japonica*: LOC\_Os, *indica*: BGIOGA). The numbers indicate the bootstrap values and the colored branches correspond to the different domain architectures of the full-length lectin sequences.

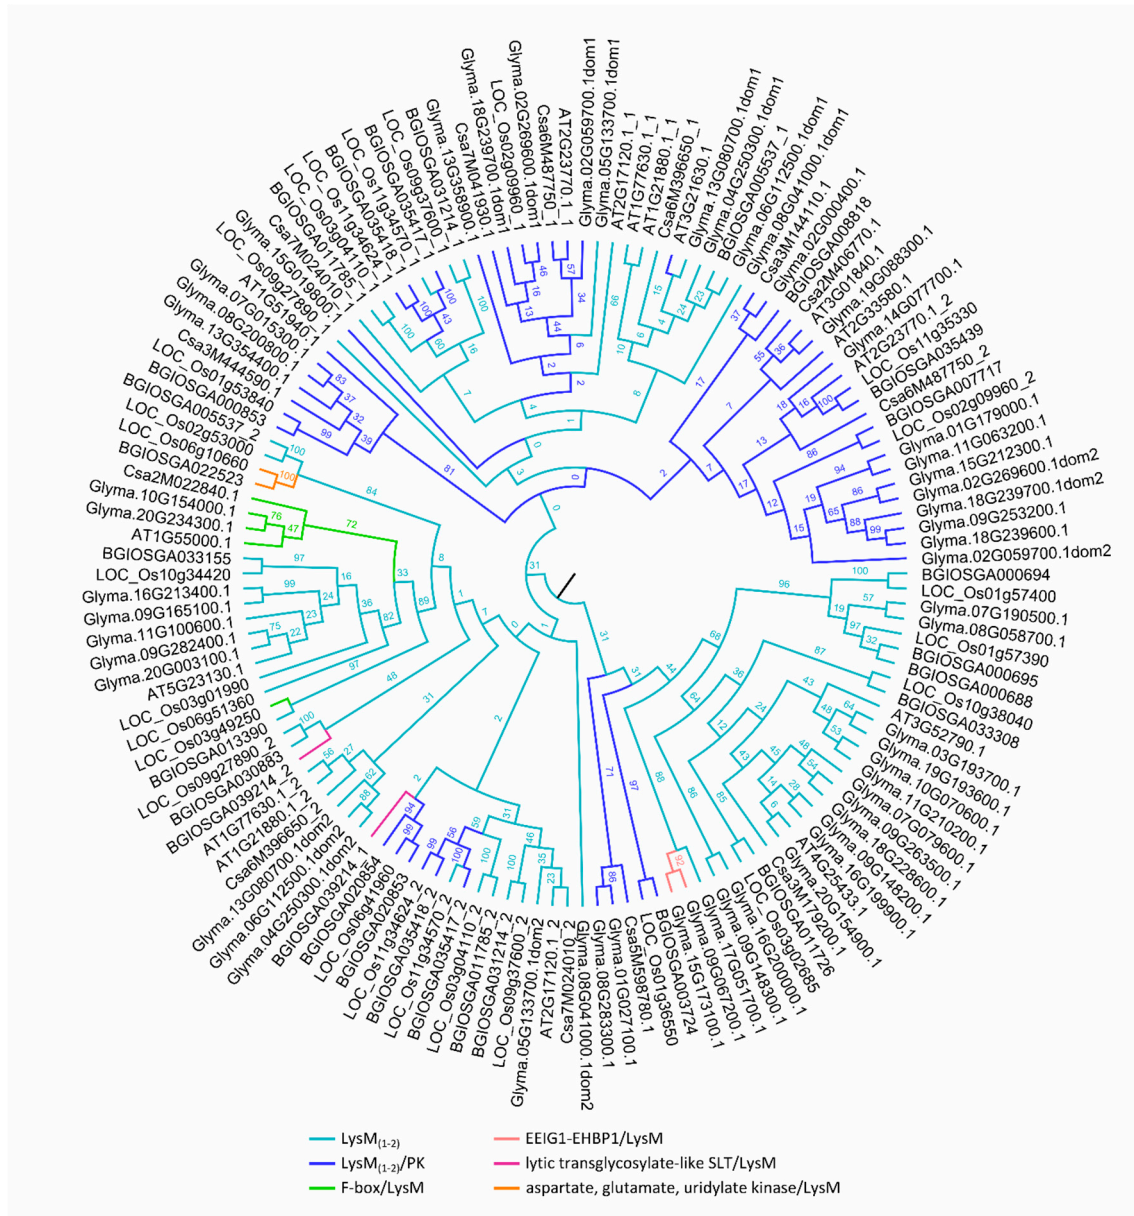

**Figure S8.** Phylogenetic relationships of the LysM domain sequences from *Arabidopsis* (AT), soybean (Glyma), cucumber (Csa), and rice (*japonica*: LOC\_Os, *indica*: BGIOGA). The numbers indicate the bootstrap values and the colored branches correspond to the different domain architectures of the full-length LysM sequences.



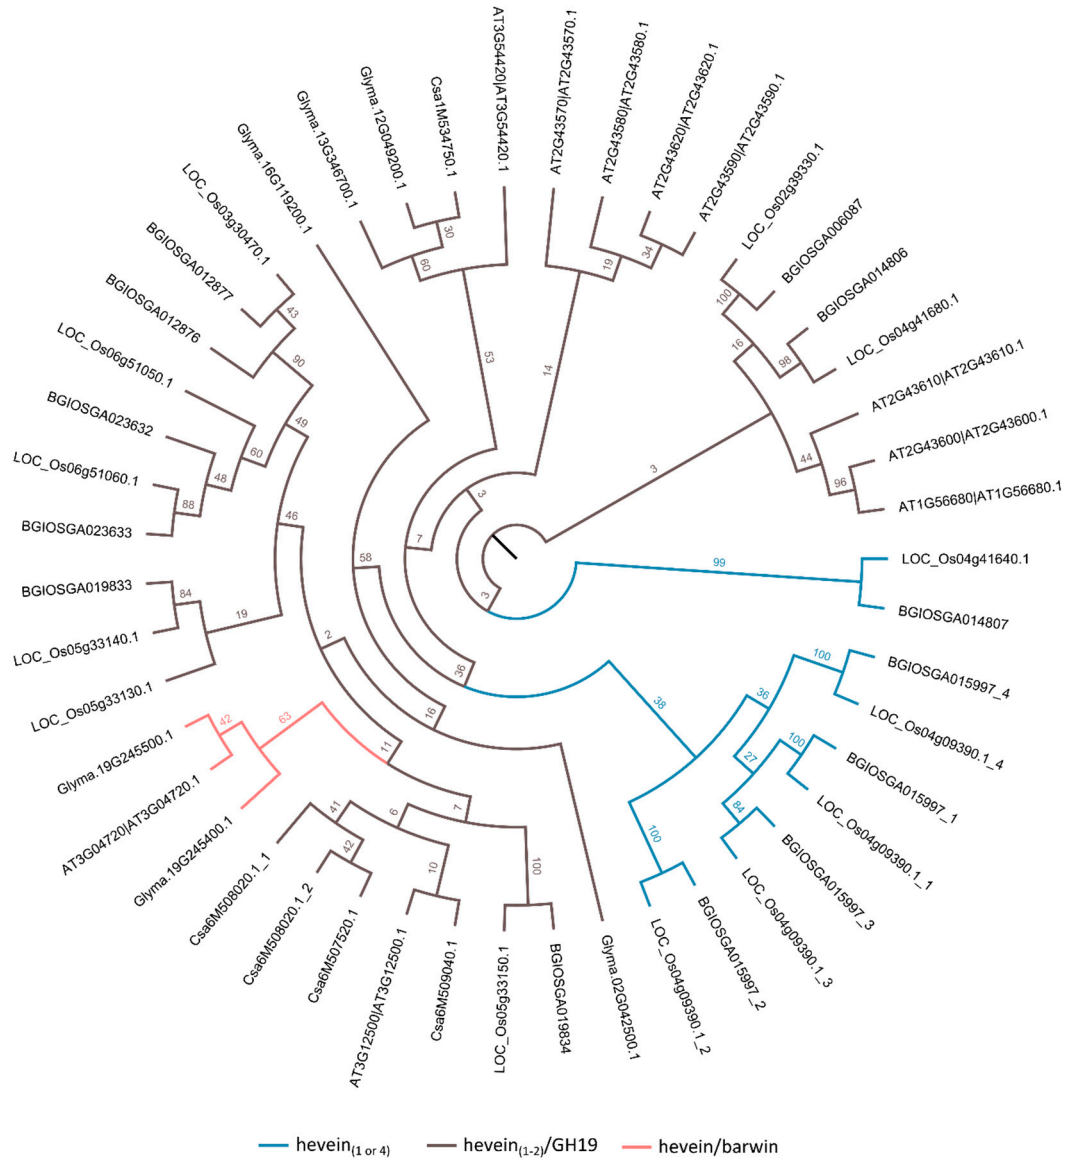

**Figure S9.** Phylogenetic relationships of the hevein domain sequences from *Arabidopsis* (AT), soybean (*Glyma*), cucumber (*Csa*), and rice (*japonica*: LOC\_Os, *indica*: BGIOGA). The numbers indicate the bootstrap values and the colored branches correspond to the different domain architectures of the full-length hevein sequences.
