# Supplementary material for: Comparative Study of Lectin Domains in Model Species: New Insights into Evolutionary Dynamics
Source: Int J Mol Sci. 2017 May 25;18(6):1136. doi: 10.3390/ijms18061136 (PMC5485960; doi:10.3390/ijms18061136)
Supplement: Supplementary file 1 [file ijms-18-01136-s001.zip › 1-ijms-198054 -supplenentary Table S2.xlsx]

## Sheet: Table S2
Table S2: Number of all identified domain combinations containing lectin motifs in the species under study. Numbers between brackets indicate the number of repeats.
Domain architecture	Arabidopsis thaliana	Glycine max	Cucumis sativus	Oryza sativa ssp japonica	Oryza sativa ssp indica
amaranthin/amaranthin/aerolysin	0	0	16	0	0
CRA	2	5	4	2	3
CRA/PK	0	1	0	0	0
CRA/CID	7	0	0	0	0
CRA/PKD-REJ-like prot/CBM5-12	0	0	0	0	1
EUL	1	3	1	2	2
EUL/EUL	0	0	0	3	3
GNA	6	9	3	2	11
GNA/PAN	3	0	2	0	0
GNA/protein kinase	3	20	11	22	7
GNA/S-locus glycoprotein	0	1	0	1	2
GNA/S-locus glycoprotein/PAN	2	4	9	6	16
GNA/S-locus glycoprotein/protein kinase	3	19	0	11	6
GNA/S-locus glycoprotein/PAN/protein kinase	13	86	18	76	33
GNA/PAN/protein kinase	2	10	2	4	5
GNA/S-locus glycoprotein/PAN/protein kinase/SRK	13	15	0	3	4
GNA/S-locus glycoprotein/PAN/SRK/protein kinase/SRK	3	0	0	0	0
GNA/PAN/S-locus glycoprotein/PAN/protein kinase/SRK	1	0	0	0	0
GNA/S-locus glycoprotein/PAN/protein kinase(2)	0	0	0	1	3
GNA/S-locus glycoprotein(2)/PAN/protein kinase	0	0	0	1	0
thaumatin/GNA/protein kinase	0	1	0	0	0
GNA/SG/PAN/TIR/NB ARC/LRR(3)	0	1	0	0	0
GNA/S-locus glycoprotein/PAN/DUF3660/protein kinase	0	0	0	1	0
GNA/S-locus glycoprotein/PAN/DUF3660/protein kinase/SRK	0	0	0	1	0
GNA/S-locus glycoprotein/PAN/DUF3404/protein kinase/SRK	0	0	0	0	1
GNA/SG/PAN/retrotransposon gag domain	0	0	0	1	0
Plant organelle RNA recognition domain/GNA/SG/PAN/PK	0	0	0	1	0
hevein	0	0	0	1	1
hevein(4)	0	0	0	1	1
hevein/barwin	1	2	0	0	0
hevein/GH19	9	4	3	8	8
hevein/hevein/GH19	0	0	1	0	0
jacalin	8	1	1	16	19
jacalin(2)	8	0	1	0	1
jacalin(3)	16	3	3	1	1
jacalin(4)	12	0	0	0	0
F-box/jacalin	0	1	0	0	0
F-box AD1/jacalin	1	0	0	0	0
F-box/F-box AD1/jacalin	1	0	0	0	0
jacalin/Kelch1(2)	2	0	0	0	0
jacalin/Kelch1(3)	1	0	0	0	0
jacalin(2)/Kelch1(4)	1	0	0	0	0
C1-like/DC1/jacalin	0	0	1	0	0
DC1/C1-like(3)/jacalin	0	0	2	0	0
peptidase C48/jacalin	0	0	0	2	0
protein kinase/jacalin	0	0	0	1	0
protein kinase/jacalin(2)	0	0	0	1	0
protein kinase/jacalin(3)	0	0	0	2	1
dirigent/jacalin	0	0	0	4	4
NB-ARC/jacalin	0	0	0	1	2
NB-ARC/jacalin(3)	0	0	0	2	2
GTPase/jacalin	0	0	0	0	1
NAM/jacalin	0	0	0	0	1
LISH dimerisation/CTLH/jacalin(3)	0	0	0	0	1
legume	13	26	2	17	12
legume(2)/protein kinase	0	1	0	1	0
legume/protein kinase	41	66	27	78	67
legume(2)/protein kinase	0	0	0	1	1
reverse transcriptase/legume/protein kinase	0	1	0	0	0
leucine zipper/legume	0	0	0	1	1
GH17/legume	0	0	0	1	0
GH1/legume	0	0	0	0	1
Zinc finger (RING)/legume/protein kinase	0	0	0	0	1
Chaperonin-like box RcbX/legume/protein kinase	0	0	0	0	1
RNA pol/nucleic acid binding domain/legume/protein kinase	0	0	0	1	0
retroviral associated/legume/protein kinase	0	0	0	3	0
legume/transposase related	0	0	0	1	0
LysM	3	20	1	8	8
LysM(2)	3	5	2	4	3
F-box/LysM	1	2	1	1	0
LysM/protein kinase	4	10	5	4	7
LysM(2)/protein kinase	1	8	1	2	2
EEIG1 EHBP1/LysM	0	2	0	0	0
Aspartate-glutamate-uridylate kinase/LysM	0	0	0	1	1
lytic transglycosylase like SLT/LysM	0	0	0	0	1
Nictaba	7	5	8	4	4
Nictaba(2)	0	1	0	0	0
F-box/Nictaba	18	25	12	13	14
F-box/Nictaba(2)	0	0	0	2	2
TIR/Nictaba	4	0	0	0	0
AIG1-type G/Nictaba	1	0	0	0	0
protein kinase/Nictaba	0	0	0	1	1
GH5/ricin B	2	6	4	3	3
GH27/ricin B	0	4	0	1	1
RIP/ricin B/ricin B	0	0	2	0	0
ricin B(2)	0	0	3	0	0
AIG1	avirulence induced gene 1
C1-like	N-terminal region of protein kinase C
CBM	carbohydrate binding module
Chaperonin-like box Rbc	Chaperonin-like box from RBCX (ribulose 1,5-bisphosphate carboxylase/oxygenase)
CID	chitinase insertion domain
CRA	homologs of class V chitinases
CTLH	CT11-RanBPM C-terminal to LisH motif domain
DC1	divergent C1 domain
EEIG1 EHBP1	estrogen early-induced gene 1/EH domain binding protein-1
EUL	Euonymus europaeus lectin
F-box AD1	F-box associated domain type 1
GH	glycoside hydrolase
GNA	Galanthus nivalis agglutinin
LISH dimerisation	Lis homology dimerisation domain
NAM	no apical meristem
NB-ARC	nucleotide binding domain shared by Apaf-1, R proteins, and CED-4
Nictaba	Nicotiana tabacum agglutinin
PKD-REJ-like prot	Receptor for Egg Jelly domain of PKD1 (Polycystin 1)
retroviral associated	retroviral aspartyl protease/reverse transcriptase domain (RVT-1)/retroviral integrase, catalytic core
RIP	ribosome-inactivating protein
RNA pol	SHS2 (strand-helix-strand-strand) domain found in N terminus of Rpb7p/Rpc25p/MJ0397 (components of the RNA polymerase 2 complex)	retrovirus zinc-finger domain/integrase, catalytic core/reverse transcriptase domain (RVT-2)	retrotransposon GAG domain/retroviral aspartyl protease/reverse transcriptase domain (RVT-1)/Chromo domain
SLT	soluble lytic transglycosylase
SRK	S-locus receptor kinase
TIR	Toll/Interleukin-1 receptor
transposase related	transposase-associated domain
Zinc finger (RING)	RING type zinc finger domain
